# Supplementary material for: Graphene Oxide/Chitosan Injectable Composite Hydrogel for Controlled Release of Doxorubicin: An Approach for Enhanced Intratumoral Delivery
Source: MDPI journal article supplement (doi:10.3390/nano12234261), 2022-11-30
Supplement: s1 [file s1]

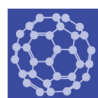

Supplementary Material

# Graphene Oxide/Chitosan Injectable Composite Hydrogel for Controlled Release of Doxorubicin: An Approach for Enhanced Intratumoral Delivery

Safaa Eltahir <sup>1</sup>, Reem Al homsi <sup>1</sup>, Jayalakshmi Jagal <sup>2</sup>, Iman Saad Ahmed <sup>1,2</sup> and Mohamed Haider <sup>1,2,\*</sup>

<sup>1</sup> Department of Pharmaceutics and Pharmaceutical Technology, College of Pharmacy, University of Sharjah, Sharjah 27272, United Arab Emirates

<sup>2</sup> Research Institute of Medical & Health Sciences, University of Sharjah, Sharjah 27272, United Arab Emirates

\* Correspondence: mhaider@sharjah.ac.ae; Tel.: +971-65057414

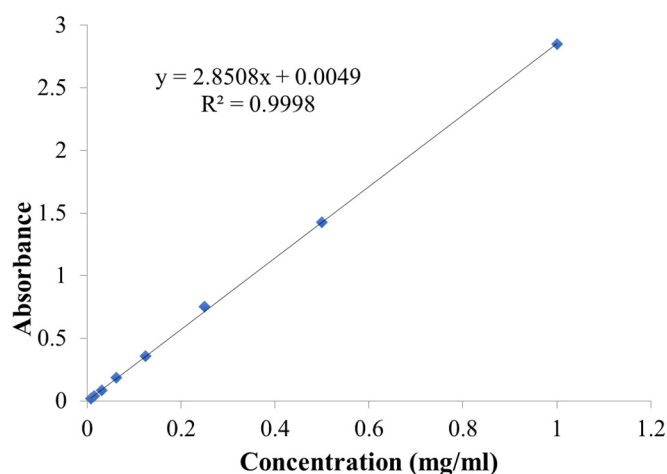

**Figure S1.** A standard calibration curve of DOX in phosphate buffer (pH = 7.4) was generated over the range of (0.001–1 mg/mL) using UV spectroscopy at 480 nm.
